# Supplementary material for: An engineered exosome for delivering sgRNA:Cas9 ribonucleoprotein complex and genome editing in recipient cells
Source: Royal Society of Chemistry journal article supplement (doi:10.1039/d0bm00427h), 2020-01-01
Supplement: d0bm00427h1.pdf [file d0bm00427h1.pdf]

Supplementary Figure 5

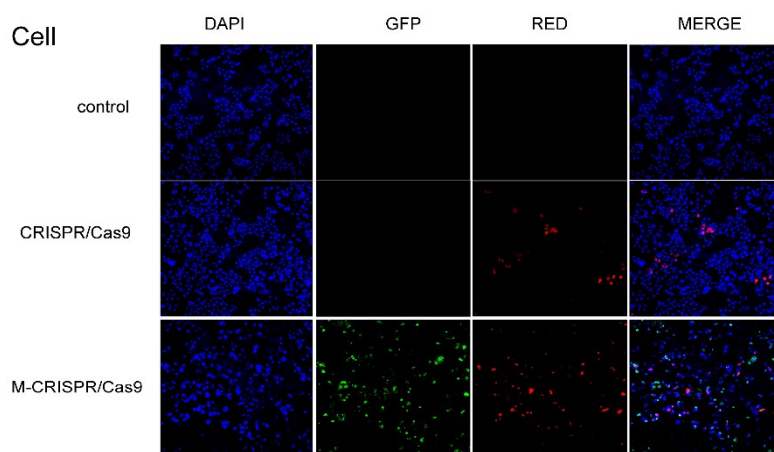

A. Confocal images showing Red fluorescent expression in A549<sup>stop-DsRed</sup> transfected with vehicles, CRISPR/Cas9

plasmids or modified CRISPR/Cas9 plasmids
